1 **Title: Maternal and children's outcomes for pregnant women with pre-existing multiple**  
2 **long-term conditions: a study protocol of an observational study in the United Kingdom**

3

4 **Authors:**

5 Siang Ing Lee,<sup>1</sup> Holly Hope,<sup>2</sup> Dermot O'Reilly,<sup>3</sup> Lisa Kent,<sup>3</sup> Gillian Santorelli,<sup>4</sup> Anuradhaa  
6 Subramanian,<sup>1</sup> Ngawai Moss,<sup>5</sup> Amaya Azcoaga-Lorenzo,<sup>6</sup> Adeniyi Francis Fagbamigbe,<sup>6,7</sup>  
7 Catherine Nelson-Piercy,<sup>8</sup> Christopher Yau,<sup>9,10</sup> Colin McCowan,<sup>6</sup> Jonathan I Kennedy,<sup>11</sup>  
8 Katherine Phillips,<sup>1</sup> Megha Singh,<sup>1</sup> Mohamed Mhereeg,<sup>11</sup> Neil Cockburn,<sup>1</sup> Peter  
9 Brocklehurst,<sup>1</sup> Rachel Plachcinski,<sup>5</sup> Richard Riley,<sup>12</sup> Shakila Thangaratinam,<sup>13,14</sup> Sinead  
10 Brophy,<sup>11</sup> Sudasing Pathirannehelage Buddhika Hemali Sudasinghe,<sup>1</sup> Utkarsh Agrawal,<sup>6</sup> Zoe  
11 Vowles,<sup>8</sup> Kathryn M Abel,<sup>2,15</sup> \* Krishnarajah Nirantharakumar,<sup>1\*</sup> Mairead Black,<sup>16\*</sup> Kelly-  
12 Ann Eastwood,<sup>3,17\*</sup> on behalf of the MuM-PreDiCT Group.

13 \*Joint senior authors

14 **Corresponding author:** Krishnarajah Nirantharakumar, [K.Nirantharan@bham.ac.uk](mailto:K.Nirantharan@bham.ac.uk)

15

16 **Affiliation:**

- 17 1. Institute of Applied Health Research, University of Birmingham, Birmingham, UK
- 18 2. Centre for Women's Mental Health, Faculty of Biology Medicine & Health, The  
19 University of Manchester, UK
- 20 3. Centre for Public Health, Queen's University of Belfast, UK
- 21 4. Bradford Institute for Health Research, UK
- 22 5. Patient and public representative, UK
- 23 6. Division of Population and Behavioural Sciences, School of Medicine, University of  
24 St Andrews, UK
- 25 7. Department of Epidemiology and Medical Statistics, College of Medicine, University  
26 of Ibadan, Nigeria
- 27 8. Guy's and St. Thomas' NHS Foundation Trust, UK
- 28 9. Nuffield Department of Women's and Reproductive Health, University of Oxford,  
29 UK
- 30 10. Health Data Research UK
- 31 11. Data Science, Medical School, Swansea University, UK
- 32 12. Centre for Prognosis Research, School of Primary, Community and Social Care,  
33 Keele University, UK

- 34 13. WHO Collaborating Centre for Global Women's Health, Institute of Metabolism and  
35 Systems Research, University of Birmingham, UK  
36 14. Department of Obstetrics and Gynaecology, Birmingham Women's and Children's  
37 NHS Foundation Trust, UK  
38 15. Greater Manchester Mental Health NHS Foundation Trust, Manchester, UK  
39 16. Aberdeen Centre for Women's Health Research, School of Medicine, Medical  
40 Science and Nutrition, University of Aberdeen, UK  
41 17. St Michael's Hospital, University Hospitals Bristol NHS Foundation Trust, UK  
42  
43

44 **Authors' ORCID:**

45 Siang Ing Lee 0000-0002-2332-5452, Holly Hope 0000-0002-4834-6719, Dermot O'Reilly  
46 0000-0002-9181-0652, Lisa Kent 0000-0002-8882-0526, Gillian Santorelli 0000-0003-0427-  
47 1783, Anuradha Subramanian 0000-0001-8875-7363, Ngawai Moss 0000-0001-9369-  
48 5072, Amaya Azcoaga-Lorenzo 0000-0003-3307-878X, Adeniyi Francis Fagbamigbe 0000-  
49 0001-9184-8258, Catherine Nelson-Piercy 0000-0001-9311-1196, Christopher Yau 0000-  
50 0001-7615-8523, Colin McCowan 0000-0002-9466-833X, Jonathan I Kennedy 0000-0002-  
51 1122-6502, Katherine Phillips 0000-0003-0674-605X, Megha Singh 0000-0003-3680-  
52 7124, Mohamed Mhereeg 0000-0003-1241-9549, Neil Cockburn 0000-0001-9284-6991,  
53 Peter Brocklehurst 0000-0002-9950-6751, Rachel Plachcinski 0000-0001-9908-  
54 0773, Richard Riley 0000-0001-8699-0735, Shakila Thangaratinam 0000-0002-4254-  
55 460X, Sinead Brophy 0000-0001-7417-2858, Utkarsh Agrawal 0000-0001-5181-6120, Zoe  
56 Vowles 0000-0001-6989-2180, Kathryn M Abel 0000-0003-3538-8896, Krishnarajah  
57 Nirantharakumar 0000-0002-6816-1279, Mairead Black 0000-0002-6841-8601, Kelly-Ann  
58 Eastwood 0000-0003-3689-0490.

59

60 **Main text word count:** 3119

61 **Keywords:** multimorbidity, multiple chronic conditions, multiple long-term conditions,  
62 pregnancy, maternity, obstetric, outcome, children, offspring

63

64 **ABSTRACT**

65 **Introduction:** One in five pregnant women have multiple long-term conditions in the United  
66 Kingdom (UK). Studies have shown that maternal multiple long-term conditions are  
67 associated with adverse outcomes. This observational study aims to compare maternal and  
68 children's outcome for pregnant women with multiple long-term to those without multiple  
69 long-term conditions.

70 **Methods and analysis:** Pregnant women aged 15 to 49 years old with a conception date  
71 between 2000 and 2019 in the UK will be included. The data source will be routine health  
72 records from all four UK nations (Clinical Practice Research Datalink [CPRD, England],  
73 Secure Anonymised Information Linkage [SAIL, Wales], Scotland routine health records and  
74 Northern Ireland Maternity System [NIMATS]), and the Born in Bradford prospective birth  
75 cohort.

76 The exposure of two or more pre-existing, long-term physical or mental health conditions  
77 will be defined from a list of health conditions predetermined by women and clinicians. The  
78 association of maternal multiple long-term conditions with (i) antenatal, (ii) peripartum, (iii)  
79 postnatal and long-term, and (iv) mental health outcomes, for both women and their children  
80 will be examined. Outcomes of interest will be guided by a core outcome set.

81 Comparisons will be made between pregnant women with and without multiple long-term  
82 conditions using logistic and Cox regression. Generalised estimating equation will account  
83 for the clustering effect of women who had more than one pregnancy episode. Where  
84 appropriate, multiple imputation with chained equation will be used for missing data.

85 Federated analysis will be conducted for each dataset and results will be pooled using meta-  
86 analysis.

87 **Ethics and dissemination:**

88 Approval has been obtained from the respective data sources in each UK nation: CPRD:  
89 Independent Scientific Advisory Committee (reference: 20\_181R); SAIL: Information  
90 Governance Review Panel; Scotland: National Health Service Scotland Public Benefit and  
91 Privacy Panel for Health and Social Care (HSC-PBPP), The University Teaching and  
92 Research Ethics Committee (UTREC) from the University of St Andrews; NIMATS: Honest  
93 Broker Service Governance Board; Born in Bradford: Bradford National Health Service  
94 Research Ethics Committee (ref 07/H1302/112).

95 Study findings will be submitted for publications in peer reviewed journals and presented at  
96 key conferences for health and social care professionals involved in the care of pregnant  
97 women with multiple long-term conditions and their children.

98

99

100

101 **ARTICLE SUMMARY**

102 **Strengths and limitations of this study**

- 103       • The study will utilise rich data sources from routine health records from all four UK  
104       nations and a birth cohort.
- 105       • Beyond examining maternal outcomes, linked mother baby data and the birth cohort  
106       data will allow for the exploration of children’s outcomes.
- 107       • Key limitations include missing data, misclassification bias due to inaccurate clinical  
108       coding and residual confounding.

## 109 INTRODUCTION

110 One in five pregnant women have two or more long-term physical or mental health  
111 conditions prior to pregnancy in the United Kingdom (UK).<sup>1</sup> In the UK 2016-18 national  
112 maternal mortality report, 90% of women who died during or up to a year after pregnancy  
113 had multiple health or social problems.<sup>2</sup> Recent evidence has shown that maternal multiple  
114 long-term conditions are associated with adverse outcomes for women and their children,  
115 such as severe maternal morbidity and mortality, pre-eclampsia, emergency caesarean birth,  
116 preterm birth, and low birth weight.<sup>3-5</sup>

117 Information on consequences for women with multiple long-term conditions and their  
118 children is crucial for women and their health care professionals to make informed decisions  
119 on pregnancy care planning. However, there remains a lack of evidence to guide care  
120 pathways for pregnant women with multiple long-term conditions.<sup>5 6</sup>

121 Healthcare is free in the UK and over 98% of the population are registered at a general  
122 practice (akin to family practice in other countries).<sup>7</sup> General practices not only provide  
123 primary and community healthcare, but they also serve as the main point of contact for  
124 referrals to specialist clinical services and provide the majority of prescribing outside of a  
125 hospital setting.<sup>7</sup> In the UK, pregnant women are recommended to have their booking  
126 appointment before 10 weeks gestation.<sup>8</sup> This is the pregnant woman's first midwife or  
127 doctor appointment, where they undergo health and social care assessment of needs and risks  
128 for her pregnancy.<sup>9</sup> Over 97% of births occur in healthcare settings in England and Wales.<sup>10</sup>  
129 Therefore, routine health records in primary and secondary care in the UK offer a rich data  
130 source for observational studies of pregnant women and their children.

131 This observational study aims to compare outcomes for women with multiple long-term  
132 conditions to those without multiple long-term conditions. Outcomes studied will include

133 those for women and their children. Datasets from routine health records from all four UK  
134 nations (England, Wales, Scotland, and Northern Ireland) will be used. In addition, the Born  
135 in Bradford birth cohort from a deprived, ethnically diverse city in the UK, will also be  
136 used.<sup>11</sup>

137 The four research objectives are to examine the association between maternal pre-existing  
138 multiple long-term conditions with: (1) antenatal, (2) peripartum, (3) postnatal and long-term  
139 outcomes, and (4) mental health outcomes. The findings from each research objective will be  
140 published in a separate paper.

141

## 142 **METHODS AND ANALYSIS**

### 143 **Study design**

144 This is an observational study using data from routine healthcare records and a prospective  
145 birth cohort in the UK.

146

### 147 **Study population and eligibility criteria**

148 The study population will consist of women aged 15-49 years old at conception, with  
149 pregnancies beginning between 2000 and 2019 in the UK. Date of conception (pregnancy  
150 start date) will be defined as the first day of the last menstrual period or gestational day 0. To  
151 ensure sufficient quality data, eligible women must have health records that meet the standard  
152 data quality checks as defined by each data source and one year's worth of health records  
153 prior to index pregnancy.

154

## 155 **Data sources**

156 Five population-based data sources (four routine health record datasets and one prospective  
157 birth cohort) that will be used are described as follows.

### 158 *(1) Clinical Practice Research Datalink (CPRD), England*

159 CPRD contains anonymised, longitudinal medical records collected during provision of  
160 routine healthcare, from participating general practices in the UK; currently 5% of UK  
161 general practices contributes to the database.<sup>12</sup> It includes data on demographics, diagnoses,  
162 symptoms, signs, tests and prescriptions.<sup>7</sup> Linkage to area based deprivation index, Hospital  
163 Episodes Statistics and Office for National Statistics death registration data is available for  
164 patients whose general practices have consented to the CPRD linkage scheme.<sup>7</sup>

165 Within CPRD, the CPRD Pregnancy Register is an algorithm that takes information from  
166 maternity, antenatal and birth health records from primary care to detect pregnancy episodes  
167 and their outcomes.<sup>13</sup> The Mother Baby Linked data, similarly links women and child records  
168 using an algorithm,<sup>14</sup> will allow for studying the outcomes of children born to mothers with  
169 multiple long-term conditions.

170 CPRD has data for patients from all four UK nations, but analyses using CPRD data will only  
171 include English general practices to avoid duplication of patients with datasets from the  
172 devolved nations (Wales, Scotland and Northern Ireland).

### 173 *(2) Secure Anonymised Information Linkage (SAIL), Wales*

174 The SAIL databank is a whole population level database in Wales. It is a repository of  
175 anonymised health and socio-economic administrative data and provides linkage at an  
176 individual level.<sup>15</sup> It holds data for 4.8 million people and covers 80% of Welsh general  
177 practices.<sup>15</sup> Within SAIL, the National Community Child Health Dataset will be used to

178 detect births and linked to the Welsh Longitudinal General Practice dataset and the Welsh  
179 Demographic Service dataset for diagnoses, prescriptions and demographics data respectively.

### 180 *(3) Scotland*

181 A dataset will be created linking the Scottish Maternity Records (SMR02) to data from  
182 Hospital Admissions (SMR01), Mental Health Inpatients (SMR04), Accident and Emergency,  
183 and the Demography and Death registry. This will cover diagnoses and demographic data for  
184 all inpatient stays and day cases for residents in Scotland. The dataset will also be linked to  
185 the Prescribing Information System for data on all medications dispensed in the community.  
186 Pregnancies will be detected from maternity records or pregnancy-related hospital admissions.

### 187 *(4) Northern Ireland Maternity System (NIMATS)*

188 NIMATS holds demographic and clinical information on mothers and infants.<sup>16</sup> It captures  
189 data relating to the current complete maternity process, and the women's past medical and  
190 obstetric history.<sup>16</sup> It is a key source for data on birth numbers, interventions, maternal risk  
191 factors, birth weights, maternal smoking, body mass index and breastfeeding on discharge.<sup>16</sup>  
192 NIMATS covers all five Health and Social Care Trusts areas across Northern Ireland (11  
193 hospitals providing maternity services in total).<sup>16</sup> Access to NIMATS is also available to  
194 midwives and clerical staff in various community clinics across NI to allow for booking  
195 appointments to be recorded.<sup>16</sup> Pregnancies will be determined from maternity records  
196 derived from data recorded at booking appointments (the first antenatal appointment) and  
197 hospital admission for childbirth.

198

### 199 *(5) Born in Bradford*

200 This birth cohort follows over 13,500 children born from around 12,500 mothers at the  
201 Bradford Royal Infirmary between March 2007 and June 2011.<sup>17</sup> Data is collected from  
202 pregnancy through childhood and into adult life.<sup>17</sup> The database consists of over 13,500  
203 pregnancies with biological samples, sociodemographic data, offspring developmental,  
204 clinical and education data and is linked to health care records from maternity, primary care  
205 (mother and offspring) and hospital admissions.<sup>17</sup>

206

### 207 **Exposure**

208 The exposed group will consist of pregnant women with multiple long-term conditions. We  
209 shall define this as two or more long-term physical or mental health conditions that pre-  
210 existed before pregnancy. Pregnancy related complications will not be included as they will  
211 be studied as outcomes. Multiple long-term conditions will be defined from a list of health  
212 conditions previously described in our epidemiological work.<sup>1</sup> Sensitivity analysis will be  
213 performed defining maternal long-term conditions with a different list of health conditions by  
214 D’Arcy et al.<sup>18</sup>

215 Exposure will be ascertained by the presence of diagnostic or prescriptions codes, including  
216 Read (to identify exposures in primary care data), International Classification of Disease 10<sup>th</sup>  
217 version (ICD-10, secondary care) and Operating Procedures Codes (OPCS) Classification of  
218 Interventions and Procedures.

219

220

221 **Comparator**

222 Pregnant women with no multiple long-term conditions (i.e. no or single long-term conditions)

223 will be the comparator group. Comparisons will be made with the following exposure group:

224 (i) pregnant women with multiple long-term conditions;

225 (ii) pregnant women with increasing counts of long-term health conditions;

226 (iii) pregnant women with different combinations of long-term health conditions.

227 (iv) pregnant women in different health condition clusters (identified from ongoing clustering

228 analyses); and

229 In addition, we will also compare the outcomes for pregnant women who have mental health

230 conditions as part of their multiple long-term conditions with pregnant women with multiple

231 long-term conditions who do not have mental health conditions.

232

233 **Outcomes**

234 The outcomes will be grouped into the following four categories based on the research

235 objectives: (1) antenatal, (2) peripartum, (3) postnatal and long-term outcomes, and (4)

236 mental health outcomes. Examples of outcomes are provided as follows, based on existing

237 core outcome sets for pregnancy and childbirth.<sup>19 20</sup> The definitive list of outcomes will be

238 confirmed once the development work for a core outcome set for studies of pregnant women

239 with multiple long-term conditions is completed.<sup>21</sup> Outcomes will be ascertained using Read,

240 ICD-10 and OPCS codes.

241

242 *(1) Antenatal*

243 Antenatal outcomes occur from conception to before the onset of childbirth. Examples for  
244 women include miscarriage, gestational hypertension, pre-eclampsia, gestational diabetes,  
245 venous thromboembolism and placenta abruption. Examples for children include fetal growth  
246 restriction.

247 *(2) Peripartum*

248 Peripartum outcomes occur during and immediately after childbirth. This category will also  
249 include survival outcomes for women and children. Examples for women include mode of  
250 birth (spontaneous vaginal birth, birth with forceps/ventouse, caesarean birth), postpartum  
251 haemorrhage, severe maternal morbidity and maternal death. Examples for children include  
252 preterm birth, small for gestational age, stillbirth, perinatal death and neonatal death.

253 *(3) Postnatal and long-term*

254 Postnatal outcomes occur in the 42 days after birth.<sup>22</sup> We will also include perinatal health  
255 care utilisation outcomes and long-term outcomes enduring beyond the peripartum and  
256 postpartum period. Examples for women include incontinence. Examples for children include  
257 congenital anomaly and neurodevelopmental disorders. Examples for health care utilisation  
258 include admission to intensive care.

259 *(4) Mental health*

260 Mental health outcomes cover the antenatal and postnatal period. Mental health outcomes  
261 will be considered up to 12 months after birth. This is to account for possible delay in women  
262 presenting to clinicians and reaching a formal diagnosis. Examples include postnatal  
263 depression, puerperal psychosis, post-traumatic stress disorder, self-harm and suicide  
264 attempts. Children's mental health and behavioural disorders will also be considered.

265 **Covariates**

266 Analyses will adjust for the following covariates in a hierarchical manner to explore potential  
267 mediating effects. Additional covariates may be added for individual outcomes based on the  
268 literature. Where data for antenatal exposures are available (e.g. from NIMATS and Born in  
269 Bradford's booking appointments), additional analyses may be conducted where appropriate.

270 *(i) Maternal age*

271 We shall explore whether the association between maternal age and the outcomes are linear.  
272 Where this is not the case and to aid clinical interpretability, we will categorise maternal age  
273 at conception into 5-yearly age bands.

274 *(ii) Parity/gravidity*

275 The variable used will depend on availability in study datasets. Where both variables are  
276 available, both will be reported with preference given to *parity* (the number of times a woman  
277 gave birth at gestation  $\geq 24$  weeks); and sensitivity analysis will be conducted using *gravidity*  
278 (the number of times a woman has been pregnant).

279 *(iii) Ethnicity*

280 Maternal ethnicity will be categorised based on the variables available in the study datasets:  
281 Asian, Black, Mixed, Other and White. Where numbers are too small and risk identifying  
282 individuals, such as in NIMATS, we may collapse the categories to White and Non-white.

283 *(iv) Social deprivation*

284 The patient level Index of Multiple Deprivation specific to each nation will be used and  
285 categorised into quintiles.

286 *(v) Body mass index*

287 We shall include the latest available pre-pregnancy body mass index (BMI) for the pregnant  
288 women. Where booking data is available before 16 weeks gestation, this will be used (e.g. in  
289 NIMATS). BMI will be considered a covariate instead of a health condition. The World  
290 Health Organisation's classification of obesity will be used to categorise BMI:  $<18.5 \text{ kg/m}^2$ ,  
291  $18.5 \text{ to } 24.9 \text{ kg/m}^2$ ,  $25.0 \text{ to } 29.9 \text{ kg/m}^2$ ,  $30.0 \text{ to } 34.9 \text{ kg/m}^2$ ,  $35.0 \text{ to } 39.9 \text{ kg/m}^2$ , and  $40+$   
292  $\text{kg/m}^2$ .<sup>23</sup> Categories may be combined where numbers are too small.

293 *(vi) Smoking*

294 We shall include the latest available pre-pregnancy smoking status for the pregnant women.  
295 Smoking status will be categorised as: non-smoker, ex-smoker, and smoker.

296 *(vii) Year (pregnancy start date)*

297 Data quality and clinical guidelines may vary by year. Its effect on outcomes will be  
298 accounted for by adjusting for year of conception in the analysis.

299

300 **Statistical analysis**

301 Baseline characteristics of the study population and outcomes will be described with  
302 summary statistics. Multivariable logistic regression will be performed to estimate the odds  
303 ratios for selected study outcomes. Cox regression will be performed for longer-term  
304 outcomes. The unit of analysis will be the pregnancy episode.

305 The covariates will be adjusted for in a hierarchical manner. This is because our prior  
306 epidemiological study observed that BMI and smoking may mediate the association between  
307 multiple long-term conditions with social deprivation.<sup>1</sup>

308 A federated analysis approach will be used, each dataset will be analysed separately within  
309 the approval of the data access. The effect sizes from the different datasets will then be  
310 included in a meta-analysis to produce a summary measure.

311 Where rare combinations of health conditions and outcomes may lead to identification of an  
312 individual or at the prespecified minimum count allowed by each data source, we will  
313 suppress the output.

314

### 315 **Pregnant women with more than one pregnancy episode**

316 An individual may have more than one pregnancy over the study period. The pregnancy  
317 episodes of the same woman will not be independent of each other. The severity of the  
318 exposure variable (pre-existing multiple long-term conditions) may increase in later  
319 pregnancy episodes as the pregnant women accumulates more long-term health conditions. If  
320 a woman had an adverse pregnancy outcome, she is more at risk of the same adverse outcome  
321 in subsequent pregnancy episodes. We shall account for this clustering effect of women with  
322 more than one pregnancy episode during the study period using the Generalised Estimating  
323 Equation in the regression analyses.

324

### 325 **Multiple pregnancies**

326 The main analysis will be limited to singleton pregnancies. Outcomes for pregnant women  
327 with multiple long-term conditions and multiple pregnancies (i.e. twins and higher order  
328 pregnancies) will be analysed as a separate cohort.

329

330

331 **Missing data**

332 Where exposure and outcome conditions are identified based on diagnostic codes, the  
333 absence of the code will be considered as an absence of the condition. The level and types of  
334 missingness of covariates will be reviewed and where appropriate will be addressed with  
335 representing missing data as a separate category or multiple imputation with chain equation  
336 (MICE). For variables required to compute an outcome, missing values will be imputed using  
337 MICE. Example of these variables include birthweight, gestational age and baby's sex to  
338 determine preterm birth and small for gestational age. For each outcome, the statistical  
339 analyses will be performed on the imputed datasets and the estimates will be pooled with  
340 Rubin's rule.

341

342 **Sensitivity analysis**

343 We shall conduct sensitivity analysis using (i) complete case analysis and (ii) varying  
344 definitions of maternal multiple long-term conditions exposure using D'Arcy et al's core  
345 exposure set.<sup>18</sup>

346

347 **Patient or user group involvement**

348 The research question was informed by discussions with our patient and public involvement  
349 (PPI) advisory group and our PPI co-investigators NM and RP.

350 The selection of outcomes are guided by our ongoing work developing a core outcome set for  
351 studies of pregnant women with multiple long-term conditions, where patients are key  
352 stakeholders.<sup>21</sup>

353 Our PPI advisory group and PPI co-investigators will be involved in interpreting the study  
354 findings, producing lay summaries and infographics, and disseminating the study findings  
355 through their network.

356

### 357 **Dissemination**

358 Study findings will be submitted for publications in peer reviewed journals and presented at  
359 key conferences for health and social care professionals involved in the care of pregnant  
360 women with multiple long-term conditions and their children. We will also organise  
361 dissemination events to share our findings with the public, service users, clinicians and  
362 researchers.

363

## 364 **DISCUSSION**

365 MuM-PreDiCT is a consortium across all four nations of the UK studying multiple long-term  
366 conditions in pregnancy. As part of MuM-PreDiCT's program of work, we outlined the  
367 protocol for an observational study of maternal and children's outcome for pregnant women  
368 with multiple long-term conditions, using routine health records and a birth cohort in the UK.

369

### 370 **Comparison with current literature**

371 A recent systematic review found seven observational studies on the association of pre-  
372 pregnancy multiple long-term conditions with adverse maternal outcomes.<sup>5</sup> The review found  
373 that pre-pregnancy multiple long-term conditions were associated with severe maternal  
374 morbidity, hypertensive disorders of pregnancy, and acute health care use in the perinatal  
375 period.<sup>5</sup> Most studies were conducted in the United States.<sup>5</sup> Authors of the review

376 commented that many studies included conditions arising in pregnancy in defining multiple  
377 long-term conditions, making it difficult to examine the impact of chronic conditions on  
378 maternal health.<sup>5</sup>

379 This proposed study will be based in the UK and will use a broad range of long-term  
380 conditions selected by women and clinicians to define multiple long-term conditions.  
381 Pregnancy related conditions and complications will be treated as study outcomes and not  
382 included in the exposure's definition. We will also study outcomes across all stages of  
383 pregnancy and outcomes for both women and their children.

384

### 385 **Strengths and limitations**

386 This proposed study will utilise routine health records from all four nations of the UK  
387 (England, Scotland, Wales and Northern Ireland). The available data sources consist of  
388 anonymised patient records from primary and secondary care, community prescription data,  
389 and maternity care data from routine booking appointments (first antenatal appointment  
390 offered universally and as the gateway to access maternity care in the UK).

391 Rich data will also be available from a prospective birth cohort from Bradford, an ethnically  
392 diverse population in England. Beyond examining maternal outcomes, linked mother baby  
393 data and the birth cohort data will allow for the exploration of children's outcomes. The key  
394 strength of this proposed study therefore is the generalisability of study findings to the UK  
395 population.

396 As this is an observational study using anonymised routine health records, key limitations  
397 include missing data, misclassification bias due to inaccurate clinical coding and residual  
398 confounding.

399 **Clinical implications**

400 Current obstetric guidelines for pregnant women with medical conditions are focused on  
401 specific and single health conditions.<sup>24</sup> There are currently no guidelines for the management  
402 of pregnant women with multiple long-term conditions in the UK. As observed in the  
403 systematic review, there is currently a lack of evidence on the consequences of pregnancy for  
404 women with multiple long-term conditions.<sup>5</sup> Our PPI advisory group and preliminary  
405 findings from our core outcome set development work have highlighted how women valued  
406 having information to help them mentally prepare to face potential adverse pregnancy  
407 outcomes.

408 The output from this study will therefore provide valuable information for women to make  
409 informed decision with their clinicians about family planning and their preconception,  
410 pregnancy and postpartum care. It will also provide valuable information to guide the future  
411 design of care pathway for women with multiple long-term conditions.

412

413 **Conclusion**

414 This protocol outlines the study design of an observational study quantifying maternal and  
415 children's outcomes for pregnant women with multiple long-term conditions. The outputs  
416 from this study will add to the current body of literature and provide valuable information to  
417 help women and their clinicians with their preconception, pregnancy and postpartum care  
418 planning.

419

420

421 **ABBREVIATIONS**

|     |        |                                                                  |
|-----|--------|------------------------------------------------------------------|
| 422 | BMI    | Body mass index                                                  |
| 423 | CPRD   | Clinical Practice Research Datalink                              |
| 424 | ICD-10 | International Classification of Disease 10 <sup>th</sup> version |
| 425 | MICE   | Multiple imputation with chain equation                          |
| 426 | NICE   | National Institute for Health and Care Excellence                |
| 427 | NIMATS | Northern Ireland Maternity System                                |
| 428 | OPCS   | Operating Procedures Codes                                       |
| 429 | PPI    | Patient and public involvement                                   |
| 430 | SAIL   | Secure Anonymised Information Linkage                            |
| 431 | UK     | United Kingdom                                                   |

432 **Ethics approval**

433 **CPRD:** CPRD has broad National Research Ethics Service Committee ethics approval for  
434 purely observational research using the primary care data and established data linkages. The  
435 study has been reviewed and approved by CPRD's Independent Scientific Advisory  
436 Committee (reference: 20\_181R).

437 **SAIL:** In accordance with UK Health Research Authority guidance, ethical approval is not  
438 mandatory for studies using only anonymised data. The study has been approved by SAIL  
439 Information Governance Review Panel.

440 **Scotland dataset:** The study has been approved by the National Health Service  
441 Scotland Public Benefit and Privacy Panel for Health and Social Care (HSC-PBPP) and The  
442 University Teaching and Research Ethics Committee (UTREC) from the University of St  
443 Andrews.

444 **NIMATS:** The study has been approved by the Honest Broker Service Governance Board.

445 **Born in Bradford:** Ethics approval was granted by Bradford National Health Service  
446 Research Ethics Committee (ref 07/H1302/112) for the Born in Bradford cohort.

447 The proposed study is purely observational and will use anonymised research data. The study  
448 will not involve participant recruitment. Therefore, consent to participate is not required.

449 **Consent for publication**

450 This is not applicable as the manuscript is a study protocol. In the proposed study, we will  
451 use de-identified study data, therefore consent for publication will not be required.

452 **Availability of data and materials**

453 This is not applicable as the manuscript is a study protocol. In the proposed study, the data  
454 that support the findings are available from CPRD, SAIL, Scotland National Health Service  
455 Scotland Public Benefit and Privacy Panel for Health and Social Care, NIMATS and Born in  
456 Bradford, but restrictions apply to the availability of these data, which were used under  
457 license for the current study, and so are not publicly available. Data are however available  
458 from the authors upon reasonable request and with permission of CPRD, SAIL, Scotland  
459 National Health Service Scotland Public Benefit and Privacy Panel for Health and Social  
460 Care, NIMATS and Born in Bradford.

#### 461 **Competing interests**

462 The authors declare that they have no competing interests.

#### 463 **Funding**

464 This work is funded by the Strategic Priority Fund “Tackling multimorbidity at scale”  
465 programme (grant number MR/W014432/1) delivered by the Medical Research Council and  
466 the National Institute for Health Research (NIHR) in partnership with the Economic and  
467 Social Research Council and in collaboration with the Engineering and Physical Sciences  
468 Research Council. The views expressed are those of the author and not necessarily those of  
469 the funders, the NIHR or the UK Department of Health and Social Care. The funders had no  
470 role in study design, decision to publish, or preparation of the manuscript.

#### 471 **Author contributions**

472 SIL – Conceptualisation, funding acquisition, methodology, writing (original draft  
473 preparation).

474 KN, MB, KAE, KMA, DOR - Conceptualisation, funding acquisition, methodology,  
475 supervision, writing (review and editing)

476 HH, GS, AS, NM, AAL, AFF, CNP, CY, CMC, JIK, PB, RP, RR, ST, SB, UA, ZV-  
477 Conceptualisation, funding acquisition, methodology, writing (review and editing)

478 LK, KP, MS, MM, NC, SPBHS - Conceptualisation, methodology, writing (review and  
479 editing)

480 All authors read and approved the manuscript.

481

482 **Acknowledgements**

483 Not applicable.

## REFERENCES

1. Lee SI, Azcoaga-Lorenzo A, Agrawal U, et al. Epidemiology of pre-existing multimorbidity in pregnant women in the UK in 2018: a population-based cross-sectional study. *BMC pregnancy and childbirth* 2022;22(1):120. doi: 10.1186/s12884-022-04442-3
2. Knight M, Bunch K, Tuffnell D, et al. Saving Lives, Improving Mothers' Care - Lessons learned to inform maternity care from the UK and Ireland Confidential Enquiries into Maternal Deaths and Morbidity 2016-18. Oxford: National Perinatal Epidemiology Unit, University of Oxford, 2020.
3. Admon LK, Winkelman TNA, Heisler M, et al. Obstetric Outcomes and Delivery-Related Health Care Utilization and Costs Among Pregnant Women With Multiple Chronic Conditions. *Preventing Chronic Disease* 2018;15:E21.
4. D'Arcy R, Knight M, Mackillop L. A retrospective audit of the socio-demographic characteristics and pregnancy outcomes for all women with multiple medical problems giving birth at a tertiary hospital in the UK in 2016. *BJOG: An International Journal of Obstetrics and Gynaecology* 2019;126:128.
5. Brown HK, McKnight A, Aker A. Association between pre-pregnancy multimorbidity and adverse maternal outcomes: A systematic review. *Journal of multimorbidity and comorbidity* 2022;12:26335565221096584. doi: 10.1177/26335565221096584 [published Online First: 2022/05/20]
6. Beeson JG, Homer CSE, Morgan C, et al. Multiple morbidities in pregnancy: Time for research, innovation, and action. *PLoS medicine* 2018;15(9):e1002665. doi: 10.1371/journal.pmed.1002665 [published Online First: 2018/09/27]
7. Herrett E, Gallagher AM, Bhaskaran K, et al. Data Resource Profile: Clinical Practice Research Datalink (CPRD). *International Journal of Epidemiology* 2015;44(3):827-36. doi: 10.1093/ije/dyv098
8. National Institute for Health and Care Excellence. Clinical Knowledge Summaries: Antenatal Care - Uncomplicated Pregnancy. 2021 [Available from: <https://cks.nice.org.uk/topics/antenatal-care-uncomplicated-pregnancy/management/antenatal-care-uncomplicated-pregnancy/#booking-appointment> accessed 5th July 2022.
9. Hatherall B, Morris J, Jamal F, et al. Timing of the initiation of antenatal care: An exploratory qualitative study of women and service providers in East London. *Midwifery* 2016;36:1-7. doi: 10.1016/j.midw.2016.02.017 [published Online First: 2016/04/24]
10. Office for National Statistics. Birth characteristics in England and Wales: 2020. 2022 [Available from: <https://www.ons.gov.uk/peoplepopulationandcommunity/birthsdeathsandmarriages/livebirths/bulletins/birthcharacteristicsinenglandandwales/2020#place-of-birth> accessed 12th July 2022.
11. Raynor P. Born in Bradford, a cohort study of babies born in Bradford, and their parents: protocol for the recruitment phase. *BMC public health* 2008;8:327. doi: 10.1186/1471-2458-8-327 [published Online First: 2008/09/25]
12. CPRD. Release notes: CPRD GOLD May 2022. 2022 [Available from: <https://cprd.com/sites/default/files/2022-05/2022-05%20CPRD%20GOLD%20Release%20Notes.pdf> accessed 14th July 2022.
13. Minassian C, Williams R, Meeraus WH, et al. Methods to generate and validate a Pregnancy Register in the UK Clinical Practice Research Datalink primary care database. *Pharmacoepidemiology and drug safety* 2019;28(7):923-33. doi: 10.1002/pds.4811 [published Online First: 2019/06/15]
14. Clinical Practice Research Datalink. CPRD Mother Baby Link Documentation 2017 [Available from: [https://cprd.com/sites/default/files/2022-02/MotherBabyLink\\_Documentation\\_v1.2.pdf](https://cprd.com/sites/default/files/2022-02/MotherBabyLink_Documentation_v1.2.pdf) accessed 8th August 2022.

15. SAIL Databank. 10 years of spearheading data privacy and research utility [cited 2021 16th February]. Available from: [https://saildatabank.com/wp-content/uploads/SAIL\\_10\\_year\\_anniversary\\_brochure.pdf](https://saildatabank.com/wp-content/uploads/SAIL_10_year_anniversary_brochure.pdf).
16. Health Data Research Innovation Gateway. Northern Ireland Regional Maternity system (NIMATS) 2021 [cited 2021 7 December]. Available from: <https://web.www.healthdatagateway.org/dataset/89d76819-32cb-48ad-9337-880f324a6ec0>.
17. Born in Bradford. About Us 2021 [cited 2021 7 December]. Available from: <https://borninbradford.nhs.uk/about-us/>.
18. D'Arcy R, Knight M. List of health conditions to define multiple long-term conditions in pregnancy. [Available from: <https://drive.google.com/file/d/1Q3LTzcXGnEFcS6eMAA0pntEUUUa-iTtp/view> accessed 14th July 2022.
19. Devane D, Begley CM, Clarke M, et al. Evaluating maternity care: a core set of outcome measures. *Birth (Berkeley, Calif)* 2007;34(2):164-72. doi: 10.1111/j.1523-536X.2006.00145.x [published Online First: 2007/06/05]
20. Nijagal MA, Wissig S, Stowell C, et al. Standardized outcome measures for pregnancy and childbirth, an ICHOM proposal. *BMC Health Services Research* 2018;18(1):953. doi: 10.1186/s12913-018-3732-3
21. Lee SI, Eastwood K-A, Moss N, et al. Protocol for the development of a core outcome set for studies of pregnant women with pre-existing multimorbidity. *BMJ Open* 2021;11(10):e044919. doi: 10.1136/bmjopen-2020-044919
22. World Health Organization. WHO Technical Consultation on Postpartum and Postnatal Care, 2010. <https://www.ncbi.nlm.nih.gov/books/NBK310595/> (accessed 6th July 2022).
23. World Health Organization. Obesity: preventing and managing the global epidemic. Report of a WHO consultation. *World Health Organization technical report series* 2000;894:i-xii, 1-253. [published Online First: 2001/03/10]
24. National Institute for Health and Care Excellence. NICE guideline [NG121]: Intrapartum care for women with existing medical conditions or obstetric complications and their babies 2019 [Available from: <https://www.nice.org.uk/guidance/ng121> accessed 8th July 2022.
